# Supplementary material for: Accuracy of Automatic Carbohydrate, Protein, Fat and Calorie Counting Based on Voice Descriptions of Meals in People with Type 1 Diabetes
Source: PubMed Central journal article supplement (PMC5946303; doi:10.3390/nu10040518), 2018-04-21
Supplement: nutrients-10-00518-s001.pdf [file nutrients-10-00518-s001.pdf]

**Table S1.** Basic characteristics of the study group.

| <b>Pat. no.</b> | <b>Age</b><br>[years] | <b>Duration of</b><br><b>diabetes</b><br>[years] | <b>Hemoglobin</b><br><b>A1c</b><br>[%] | <b>Hemoglobin</b><br><b>A1c</b><br>[mmol/mol] |
|-----------------|-----------------------|--------------------------------------------------|----------------------------------------|-----------------------------------------------|
| 1               | 22                    | 6                                                | 10.0                                   | 86                                            |
| 2               | 19                    | 7                                                | 6.1                                    | 43                                            |
| 3               | 27                    | 16                                               | 8.3                                    | 67                                            |
| 4               | 20                    | 11                                               | 8.6                                    | 70                                            |
| 5               | 19                    | 13                                               | 7.6                                    | 60                                            |
| 6               | 22                    | 8                                                | 8.9                                    | 74                                            |
| 7               | 28                    | 25                                               | 8.3                                    | 67                                            |
| 8               | 24                    | 5                                                | 7.6                                    | 60                                            |
| 9               | 20                    | 7                                                | 8.0                                    | 64                                            |
| 10              | 27                    | 20                                               | 7.7                                    | 61                                            |
| 11              | 19                    | 16                                               | 9.7                                    | 83                                            |
| 12              | 21                    | 11                                               | 8.7                                    | 72                                            |
| 13              | 21                    | 8                                                | 8.3                                    | 67                                            |
| 14              | 29                    | 13                                               | 6.4                                    | 46                                            |
| 15              | 19                    | 5                                                | 8.4                                    | 68                                            |
| 16              | 28                    | 20                                               | 8.0                                    | 64                                            |
| 17              | 38                    | 3                                                | 7.7                                    | 61                                            |
| 18              | 20                    | 10                                               | 7.7                                    | 61                                            |
| 19              | 28                    | 3                                                | 12.6                                   | 114                                           |
| 20              | 21                    | 13                                               | 10.6                                   | 92                                            |
| 21              | 25                    | 15                                               | 6.8                                    | 51                                            |
| 22              | 24                    | 11                                               | 10.1                                   | 87                                            |
| 23              | 19                    | 3                                                | 6.8                                    | 51                                            |
| 24              | 19                    | 13                                               | 11.0                                   | 97                                            |
| 25              | 25                    | 6                                                | 8.2                                    | 66                                            |
| 26              | 30                    | 23                                               | 10.1                                   | 87                                            |
| 27              | 22                    | 10                                               | 6.4                                    | 46                                            |
| 28              | 31                    | 25                                               | 8.1                                    | 65                                            |
| 29              | 25                    | 17                                               | 6.4                                    | 46                                            |
| 30              | 22                    | 11                                               | 9.2                                    | 77                                            |

**Table S2.** Carbohydrate exchange units (CU), protein-fat exchange units (PFU) and calorie content (kcal) of meals calculated by the dietitian and estimated by the VoiceDiab system.

| Pat. no. | Day | Meal <sup>1</sup> | Dietitian |     |      | VoiceDiab |     |      |
|----------|-----|-------------------|-----------|-----|------|-----------|-----|------|
|          |     |                   | CU        | PFU | kcal | CU        | PFU | kcal |
| 1        | 1   | 1                 | 5.5       | 2.2 | 460  | 5.0       | 3.2 | 521  |
| 1        | 1   | 3                 | 5.3       | 3.0 | 528  | 5.1       | 2.3 | 433  |
| 1        | 1   | 4                 | 1.0       | 0.0 | 70   | 1.3       | 0.0 | 51   |
| 1        | 1   | 5                 | 3.2       | 2.3 | 363  | 3.5       | 2.6 | 406  |
| 1        | 2   | 1                 | 3.0       | 1.5 | 290  | 3.5       | 1.8 | 314  |
| 1        | 2   | 2                 | 1.0       | 0.4 | 77   | 1.3       | 0.4 | 92   |
| 1        | 2   | 3                 | 6.0       | 3.0 | 534  | 6.6       | 2.5 | 508  |
| 1        | 2   | 4                 | 1.0       | 0.0 | 70   | 1.3       | 0.4 | 92   |
| 1        | 2   | 5                 | 3.4       | 1.5 | 297  | 2.7       | 1.8 | 285  |
| 1        | 3   | 1                 | 3.3       | 2.0 | 335  | 3.5       | 2.3 | 370  |
| 1        | 3   | 2                 | 0.8       | 0.6 | 102  | 1.2       | 0.6 | 103  |
| 1        | 3   | 3                 | 4.7       | 2.4 | 481  | 4.2       | 2.6 | 427  |
| 1        | 3   | 4                 | 1.0       | 0.0 | 46   | 1.3       | 0.0 | 51   |
| 1        | 3   | 5                 | 3.7       | 1.9 | 349  | 4.2       | 1.8 | 346  |
| 1        | 4   | 1                 | 3.5       | 1.5 | 343  | 3.9       | 1.8 | 332  |
| 1        | 4   | 2                 | 0.6       | 0.3 | 56   | 1.0       | 0.4 | 78   |
| 1        | 4   | 3                 | 5.9       | 2.8 | 590  | 6.6       | 2.1 | 475  |
| 1        | 4   | 4                 | 1.0       | 0.0 | 46   | 1.3       | 0.0 | 51   |
| 1        | 4   | 5                 | 3.5       | 2.0 | 350  | 3.9       | 2.1 | 372  |
| 1        | 5   | 1                 | 3.6       | 1.1 | 342  | 4.0       | 1.5 | 309  |
| 1        | 5   | 2                 | 0.8       | 0.3 | 72   | 1.1       | 0.4 | 85   |
| 1        | 5   | 3                 | 5.0       | 3.6 | 570  | 5.4       | 1.6 | 376  |
| 2        | 1   | 1                 | 5.0       | 2.0 | 420  | 3.3       | 2.4 | 374  |
| 2        | 1   | 2                 | 1.5       | 0.3 | 100  | 1.1       | 0.4 | 85   |
| 2        | 1   | 3                 | 6.7       | 2.7 | 600  | 7.0       | 1.9 | 471  |
| 2        | 1   | 4                 | 1.0       | 0.0 | 50   | 1.3       | 0.0 | 51   |
| 2        | 1   | 5                 | 5.8       | 3.0 | 540  | 6.1       | 2.4 | 483  |
| 2        | 2   | 1                 | 5.3       | 2.4 | 459  | 4.6       | 2.3 | 419  |
| 2        | 2   | 2                 | 1.2       | 0.5 | 99   | 1.3       | 0.4 | 92   |
| 2        | 2   | 3                 | 7.2       | 3.9 | 695  | 6.7       | 3.0 | 567  |
| 2        | 2   | 4                 | 2.0       | 0.4 | 131  | 2.5       | 0.6 | 156  |
| 2        | 2   | 5                 | 6.3       | 3.5 | 616  | 5.8       | 3.5 | 582  |
| 2        | 3   | 1                 | 5.8       | 3.0 | 540  | 5.3       | 2.5 | 456  |
| 2        | 3   | 2                 | 2.0       | 0.4 | 131  | 2.5       | 0.4 | 136  |
| 2        | 3   | 3                 | 8.0       | 4.4 | 768  | 6.9       | 3.1 | 584  |
| 2        | 3   | 4                 | 2.0       | 0.4 | 131  | 2.5       | 0.4 | 136  |
| 2        | 3   | 5                 | 5.4       | 3.3 | 552  | 5.8       | 2.0 | 432  |
| 2        | 4   | 1                 | 5.2       | 3.7 | 587  | 5.7       | 3.2 | 552  |
| 2        | 4   | 2                 | 2.2       | 0.4 | 138  | 2.6       | 0.4 | 143  |
| 2        | 4   | 3                 | 6.1       | 3.2 | 567  | 7.1       | 2.1 | 492  |
| 2        | 4   | 4                 | 2.1       | 0.4 | 126  | 2.5       | 0.4 | 136  |
| 2        | 4   | 5                 | 5.6       | 3.3 | 564  | 6.2       | 2.4 | 490  |
| 2        | 5   | 1                 | 5.4       | 2.8 | 500  | 5.8       | 2.8 | 506  |
| 2        | 5   | 2                 | 2.6       | 1.1 | 222  | 2.6       | 0.9 | 192  |
| 2        | 5   | 3                 | 9.1       | 4.2 | 800  | 8.0       | 3.2 | 640  |
| 3        | 1   | 1                 | 3.2       | 0.9 | 229  | 3.9       | 1.2 | 276  |
| 3        | 1   | 2                 | 1.0       | 0.4 | 85   | 0.9       | 0.6 | 93   |
| 3        | 1   | 3                 | 5.2       | 2.3 | 449  | 4.0       | 2.6 | 420  |
| 3        | 1   | 4                 | 1.0       | 0.0 | 50   | 1.3       | 0.0 | 51   |
| 3        | 1   | 5                 | 3.4       | 1.9 | 333  | 3.9       | 1.9 | 349  |
| 3        | 2   | 1                 | 3.3       | 2.3 | 349  | 3.4       | 1.9 | 330  |

| Pat. no. | Day | Meal <sup>1</sup> | Dietitian |     |      | VoiceDiab |     |      |
|----------|-----|-------------------|-----------|-----|------|-----------|-----|------|
|          |     |                   | CU        | PFU | kcal | CU        | PFU | kcal |
| 3        | 2   | 2                 | 0.9       | 0.4 | 77   | 1.0       | 0.4 | 78   |
| 3        | 2   | 3                 | 5.1       | 3.3 | 546  | 4.9       | 2.3 | 421  |
| 3        | 2   | 4                 | 1.0       | 0.0 | 46   | 1.3       | 0.0 | 51   |
| 3        | 2   | 5                 | 3.5       | 2.3 | 360  | 3.9       | 1.9 | 348  |
| 3        | 3   | 1                 | 3.6       | 2.3 | 359  | 3.9       | 1.9 | 346  |
| 3        | 3   | 3                 | 6.7       | 2.9 | 592  | 6.9       | 2.4 | 516  |
| 3        | 3   | 4                 | 1.0       | 0.0 | 50   | 1.3       | 0.0 | 51   |
| 3        | 3   | 5                 | 3.2       | 1.9 | 326  | 3.5       | 2.3 | 376  |
| 3        | 4   | 1                 | 3.3       | 1.9 | 326  | 3.5       | 2.3 | 370  |
| 3        | 4   | 2                 | 1.0       | 0.7 | 114  | 1.2       | 0.6 | 103  |
| 3        | 4   | 3                 | 5.0       | 2.0 | 412  | 4.8       | 1.8 | 363  |
| 4        | 1   | 1                 | 3.5       | 2.2 | 372  | 4.0       | 2.2 | 376  |
| 4        | 1   | 2                 | 1.1       | 0.3 | 80   | 1.2       | 0.3 | 75   |
| 4        | 1   | 3                 | 4.4       | 2.4 | 419  | 4.6       | 1.9 | 374  |
| 4        | 1   | 5                 | 3.2       | 1.9 | 326  | 3.5       | 1.7 | 309  |
| 4        | 2   | 1                 | 3.2       | 1.9 | 326  | 3.5       | 1.7 | 309  |
| 4        | 2   | 3                 | 6.6       | 1.9 | 461  | 6.6       | 1.9 | 446  |
| 4        | 2   | 5                 | 4.6       | 2.0 | 390  | 3.9       | 2.8 | 432  |
| 4        | 3   | 1                 | 3.5       | 2.2 | 372  | 4.0       | 2.2 | 376  |
| 4        | 3   | 3                 | 5.8       | 3.0 | 543  | 5.8       | 2.5 | 482  |
| 4        | 3   | 5                 | 3.4       | 2.5 | 392  | 3.6       | 1.8 | 370  |
| 4        | 4   | 1                 | 3.3       | 2.8 | 414  | 3.4       | 1.9 | 383  |
| 4        | 4   | 3                 | 6.0       | 2.8 | 530  | 6.5       | 1.7 | 426  |
| 4        | 4   | 5                 | 3.2       | 3.5 | 485  | 3.5       | 2.8 | 480  |
| 5        | 1   | 3                 | 6.5       | 3.9 | 667  | 5.5       | 2.8 | 488  |
| 5        | 1   | 4                 | 2.6       | 0.4 | 150  | 2.5       | 0.3 | 126  |
| 5        | 1   | 5                 | 5.8       | 3.0 | 540  | 6.3       | 2.2 | 478  |
| 5        | 2   | 1                 | 3.4       | 2.5 | 399  | 3.9       | 2.4 | 392  |
| 5        | 2   | 2                 | 1.3       | 0.7 | 125  | 1.3       | 0.4 | 92   |
| 5        | 2   | 3                 | 5.8       | 4.1 | 654  | 5.2       | 2.8 | 489  |
| 5        | 2   | 4                 | 2.5       | 0.5 | 163  | 2.5       | 0.3 | 126  |
| 5        | 2   | 5                 | 5.3       | 3.3 | 545  | 5.7       | 2.4 | 467  |
| 5        | 3   | 1                 | 3.3       | 2.5 | 395  | 3.5       | 1.9 | 334  |
| 5        | 3   | 2                 | 1.8       | 0.7 | 152  | 1.8       | 0.6 | 131  |
| 5        | 3   | 3                 | 2.3       | 2.7 | 363  | 4.3       | 2.0 | 370  |
| 5        | 3   | 4                 | 2.5       | 0.5 | 162  | 2.5       | 0.5 | 168  |
| 5        | 3   | 5                 | 5.8       | 3.0 | 542  | 6.4       | 2.5 | 505  |
| 5        | 4   | 1                 | 3.3       | 3.3 | 469  | 3.9       | 2.8 | 434  |
| 5        | 4   | 2                 | 1.3       | 0.7 | 124  | 1.3       | 0.4 | 92   |
| 5        | 4   | 3                 | 5.2       | 2.9 | 503  | 5.5       | 2.5 | 462  |
| 5        | 4   | 4                 | 2.5       | 0.5 | 162  | 2.0       | 0.3 | 112  |
| 5        | 4   | 5                 | 5.4       | 3.3 | 550  | 5.8       | 2.4 | 468  |
| 5        | 5   | 1                 | 3.7       | 2.9 | 444  | 4.1       | 1.8 | 342  |
| 5        | 5   | 2                 | 1.8       | 0.7 | 119  | 1.7       | 0.3 | 103  |
| 5        | 5   | 3                 | 4.0       | 4.5 | 501  | 3.9       | 2.0 | 358  |
| 6        | 1   | 2                 | 1.7       | 0.4 | 111  | 1.6       | 0.3 | 93   |
| 6        | 1   | 3                 | 7.3       | 3.1 | 453  | 6.6       | 1.2 | 373  |
| 6        | 1   | 4                 | 2.1       | 0.4 | 125  | 2.1       | 0.3 | 114  |
| 6        | 1   | 5                 | 5.5       | 2.8 | 617  | 5.7       | 2.8 | 513  |
| 6        | 2   | 1                 | 5.3       | 3.1 | 527  | 5.7       | 2.9 | 520  |
| 6        | 2   | 3                 | 5.9       | 3.2 | 568  | 6.9       | 3.0 | 580  |
| 6        | 2   | 5                 | 5.6       | 2.8 | 508  | 6.0       | 2.6 | 505  |
| 6        | 3   | 1                 | 5.3       | 3.3 | 544  | 5.7       | 3.1 | 538  |
| 6        | 3   | 2                 | 1.7       | 0.6 | 135  | 1.8       | 0.6 | 132  |

| Pat. no. | Day | Meal <sup>1</sup> | Dietitian |     |      | VoiceDiab |     |      |
|----------|-----|-------------------|-----------|-----|------|-----------|-----|------|
|          |     |                   | CU        | PFU | kcal | CU        | PFU | kcal |
| 6        | 3   | 3                 | 7.3       | 4.1 | 715  | 7.7       | 3.8 | 690  |
| 6        | 3   | 5                 | 6.7       | 3.4 | 612  | 6.5       | 3.6 | 618  |
| 6        | 4   | 1                 | 5.7       | 3.5 | 581  | 6.2       | 3.4 | 586  |
| 6        | 4   | 2                 | 1.3       | 0.6 | 119  | 1.5       | 0.6 | 119  |
| 6        | 4   | 3                 | 6.5       | 3.8 | 644  | 6.4       | 3.7 | 616  |
| 6        | 4   | 5                 | 5.6       | 3.3 | 557  | 6.0       | 3.1 | 552  |
| 6        | 5   | 1                 | 6.0       | 3.6 | 602  | 6.2       | 3.2 | 572  |
| 6        | 5   | 3                 | 6.0       | 3.6 | 544  | 6.4       | 3.1 | 564  |
| 7        | 1   | 1                 | 3.4       | 2.2 | 365  | 3.7       | 2.2 | 364  |
| 7        | 1   | 3                 | 4.1       | 2.4 | 411  | 4.5       | 2.3 | 411  |
| 7        | 1   | 4                 | 1.0       | 0.0 | 46   | 1.1       | 0.0 | 41   |
| 7        | 1   | 5                 | 3.2       | 1.9 | 326  | 3.5       | 1.8 | 319  |
| 7        | 2   | 1                 | 3.2       | 2.1 | 350  | 3.5       | 2.0 | 343  |
| 7        | 2   | 2                 | 1.1       | 0.3 | 82   | 1.0       | 0.4 | 78   |
| 7        | 2   | 3                 | 5.0       | 2.2 | 423  | 3.9       | 1.5 | 307  |
| 7        | 2   | 4                 | 1.0       | 0.0 | 46   | 1.3       | 0.0 | 51   |
| 7        | 2   | 5                 | 3.4       | 1.9 | 334  | 3.9       | 1.8 | 333  |
| 7        | 3   | 1                 | 3.2       | 1.9 | 326  | 3.5       | 1.8 | 319  |
| 7        | 3   | 3                 | 4.8       | 2.6 | 459  | 5.3       | 1.9 | 399  |
| 8        | 1   | 3                 | 5.2       | 2.3 | 441  | 5.3       | 2.3 | 442  |
| 8        | 1   | 4                 | 1.0       | 0.0 | 46   | 0.9       | 0.0 | 34   |
| 8        | 1   | 5                 | 3.7       | 2.6 | 406  | 4.1       | 2.4 | 405  |
| 8        | 2   | 1                 | 3.2       | 1.0 | 250  | 3.4       | 1.0 | 233  |
| 8        | 2   | 2                 | 1.1       | 0.3 | 82   | 1.0       | 0.4 | 78   |
| 8        | 2   | 3                 | 5.2       | 2.5 | 462  | 4.8       | 2.1 | 404  |
| 8        | 2   | 4                 | 1.0       | 0.0 | 46   | 1.3       | 0.0 | 51   |
| 8        | 2   | 5                 | 3.3       | 2.2 | 359  | 3.8       | 2.1 | 358  |
| 8        | 3   | 1                 | 3.7       | 2.5 | 406  | 4.1       | 2.4 | 405  |
| 8        | 3   | 2                 | 1.1       | 0.3 | 79   | 1.2       | 0.3 | 80   |
| 8        | 3   | 3                 | 5.1       | 3.1 | 406  | 5.2       | 2.9 | 497  |
| 8        | 3   | 4                 | 1.0       | 0.0 | 46   | 1.3       | 0.0 | 51   |
| 8        | 3   | 5                 | 3.4       | 0.8 | 221  | 3.7       | 0.7 | 217  |
| 8        | 4   | 1                 | 3.3       | 1.2 | 261  | 3.5       | 0.7 | 208  |
| 8        | 4   | 2                 | 1.1       | 0.3 | 82   | 1.0       | 0.4 | 78   |
| 8        | 4   | 3                 | 5.6       | 1.9 | 421  | 5.0       | 1.3 | 323  |
| 8        | 4   | 4                 | 1.0       | 0.0 | 46   | 1.3       | 0.0 | 51   |
| 8        | 4   | 5                 | 3.3       | 2.1 | 351  | 3.8       | 2.0 | 351  |
| 8        | 5   | 1                 | 3.2       | 1.3 | 268  | 3.5       | 1.4 | 281  |
| 8        | 5   | 2                 | 1.1       | 0.7 | 119  | 1.1       | 0.7 | 112  |
| 8        | 5   | 3                 | 4.9       | 3.0 | 500  | 5.1       | 2.4 | 442  |
| 9        | 1   | 3                 | 5.2       | 1.2 | 338  | 5.3       | 0.7 | 285  |
| 9        | 1   | 4                 | 1.0       | 0.0 | 46   | 1.3       | 0.0 | 51   |
| 9        | 1   | 5                 | 3.7       | 2.6 | 406  | 4.1       | 2.4 | 405  |
| 9        | 2   | 1                 | 3.5       | 2.5 | 396  | 3.8       | 2.4 | 391  |
| 9        | 2   | 2                 | 1.1       | 0.3 | 82   | 1.0       | 0.4 | 78   |
| 9        | 2   | 3                 | 5.9       | 3.0 | 540  | 6.2       | 1.6 | 412  |
| 9        | 2   | 4                 | 1.0       | 0.0 | 46   | 1.3       | 0.0 | 51   |
| 9        | 2   | 5                 | 3.4       | 2.8 | 422  | 3.8       | 2.7 | 421  |
| 9        | 3   | 1                 | 3.7       | 2.5 | 406  | 4.1       | 2.4 | 405  |
| 9        | 3   | 2                 | 1.0       | 0.7 | 112  | 0.9       | 0.7 | 108  |
| 9        | 3   | 3                 | 5.0       | 4.2 | 621  | 4.9       | 3.2 | 522  |
| 9        | 3   | 5                 | 3.3       | 3.2 | 460  | 3.6       | 3.1 | 457  |
| 9        | 4   | 1                 | 3.2       | 2.4 | 374  | 3.4       | 2.4 | 371  |
| 9        | 4   | 3                 | 5.9       | 1.2 | 350  | 5.5       | 0.7 | 288  |

| Pat. no. | Day | Meal <sup>1</sup> | Dietitian |     |      | VoiceDiab |     |      |
|----------|-----|-------------------|-----------|-----|------|-----------|-----|------|
|          |     |                   | CU        | PFU | kcal | CU        | PFU | kcal |
| 9        | 4   | 4                 | 1.0       | 0.0 | 46   | 1.3       | 0.0 | 51   |
| 9        | 4   | 5                 | 3.3       | 3.2 | 462  | 3.8       | 3.1 | 462  |
| 9        | 5   | 1                 | 3.2       | 2.4 | 374  | 3.5       | 2.3 | 367  |
| 9        | 5   | 3                 | 5.9       | 1.5 | 393  | 6.1       | 1.5 | 394  |
| 10       | 1   | 3                 | 5.7       | 2.6 | 494  | 4.9       | 2.4 | 437  |
| 10       | 1   | 4                 | 1.0       | 0.0 | 46   | 1.3       | 0.0 | 51   |
| 10       | 1   | 5                 | 3.2       | 1.9 | 326  | 3.5       | 1.8 | 319  |
| 10       | 2   | 1                 | 3.2       | 1.9 | 326  | 3.5       | 1.8 | 319  |
| 10       | 2   | 2                 | 1.1       | 0.3 | 79   | 1.1       | 0.7 | 117  |
| 10       | 2   | 3                 | 5.3       | 2.6 | 479  | 4.3       | 2.3 | 405  |
| 10       | 2   | 4                 | 1.0       | 0.0 | 46   | 1.3       | 0.0 | 51   |
| 10       | 2   | 5                 | 3.7       | 2.5 | 406  | 4.1       | 2.4 | 405  |
| 10       | 3   | 1                 | 3.4       | 1.9 | 334  | 3.9       | 1.8 | 333  |
| 10       | 3   | 2                 | 0.8       | 0.5 | 91   | 0.8       | 0.6 | 92   |
| 10       | 3   | 3                 | 6.3       | 2.8 | 541  | 5.2       | 2.8 | 543  |
| 10       | 3   | 4                 | 1.0       | 0.0 | 46   | 0.9       | 0.0 | 34   |
| 10       | 3   | 5                 | 3.5       | 2.5 | 398  | 3.8       | 2.4 | 391  |
| 10       | 4   | 1                 | 3.2       | 1.9 | 326  | 3.5       | 1.8 | 319  |
| 10       | 4   | 2                 | 1.1       | 0.3 | 82   | 1.0       | 0.4 | 78   |
| 10       | 4   | 3                 | 4.7       | 2.8 | 476  | 5.0       | 1.6 | 356  |
| 10       | 4   | 4                 | 1.0       | 0.0 | 46   | 0.9       | 0.0 | 34   |
| 10       | 4   | 5                 | 3.3       | 3.2 | 462  | 3.8       | 3.1 | 462  |
| 10       | 5   | 1                 | 3.7       | 2.5 | 406  | 4.1       | 2.4 | 405  |
| 10       | 5   | 2                 | 0.8       | 0.4 | 79   | 0.9       | 0.5 | 80   |
| 10       | 5   | 3                 | 5.1       | 3.3 | 541  | 5.2       | 3.0 | 506  |
| 10       | 5   | 4                 | 1.0       | 0.0 | 46   | 1.3       | 0.0 | 51   |
| 10       | 5   | 5                 | 3.2       | 1.9 | 326  | 3.5       | 1.8 | 319  |
| 11       | 1   | 3                 | 5.7       | 2.6 | 494  | 5.2       | 2.5 | 463  |
| 11       | 1   | 4                 | 1.0       | 0.0 | 46   | 1.3       | 0.0 | 51   |
| 11       | 1   | 5                 | 3.2       | 1.9 | 326  | 3.5       | 1.8 | 319  |
| 11       | 2   | 1                 | 3.2       | 1.9 | 326  | 3.5       | 1.8 | 319  |
| 11       | 2   | 2                 | 1.1       | 0.3 | 79   | 1.1       | 0.4 | 76   |
| 11       | 2   | 3                 | 5.5       | 2.7 | 482  | 4.5       | 1.9 | 373  |
| 11       | 2   | 4                 | 1.0       | 0.0 | 46   | 1.3       | 0.0 | 51   |
| 11       | 2   | 5                 | 3.7       | 2.5 | 406  | 3.7       | 2.5 | 395  |
| 11       | 3   | 1                 | 3.4       | 1.9 | 334  | 3.9       | 1.8 | 333  |
| 11       | 3   | 2                 | 0.8       | 0.5 | 91   | 0.9       | 0.6 | 91   |
| 11       | 3   | 3                 | 6.1       | 2.2 | 475  | 6.3       | 2.2 | 476  |
| 11       | 3   | 4                 | 1.0       | 0.0 | 46   | 0.9       | 0.0 | 34   |
| 11       | 3   | 5                 | 3.5       | 2.5 | 398  | 3.8       | 2.4 | 391  |
| 11       | 4   | 1                 | 3.2       | 1.9 | 326  | 3.5       | 1.8 | 319  |
| 11       | 4   | 2                 | 1.1       | 0.3 | 82   | 1.0       | 0.4 | 78   |
| 11       | 4   | 3                 | 4.7       | 2.8 | 476  | 5.0       | 1.6 | 356  |
| 11       | 4   | 4                 | 1.0       | 0.0 | 46   | 0.9       | 0.0 | 34   |
| 11       | 4   | 5                 | 3.3       | 3.2 | 462  | 3.8       | 3.1 | 462  |
| 11       | 5   | 1                 | 3.7       | 2.5 | 406  | 4.1       | 2.4 | 405  |
| 11       | 5   | 2                 | 0.8       | 0.4 | 79   | 0.9       | 0.5 | 80   |
| 11       | 5   | 3                 | 4.7       | 3.3 | 524  | 4.8       | 3.4 | 528  |
| 11       | 5   | 4                 | 1.0       | 0.0 | 46   | 1.3       | 0.0 | 51   |
| 11       | 5   | 5                 | 3.2       | 1.9 | 326  | 3.5       | 1.8 | 319  |
| 12       | 1   | 3                 | 5.7       | 2.6 | 492  | 6.1       | 2.4 | 490  |
| 12       | 1   | 4                 | 1.0       | 0.0 | 46   | 1.3       | 0.0 | 51   |
| 12       | 1   | 5                 | 3.7       | 2.5 | 406  | 4.1       | 2.4 | 405  |
| 12       | 2   | 1                 | 4.5       | 2.3 | 417  | 4.9       | 2.1 | 410  |

| Pat. no. | Day | Meal <sup>1</sup> | Dietitian |     |      | VoiceDiab |     |      |
|----------|-----|-------------------|-----------|-----|------|-----------|-----|------|
|          |     |                   | CU        | PFU | kcal | CU        | PFU | kcal |
| 12       | 2   | 2                 | 1.1       | 0.3 | 82   | 1.0       | 0.4 | 78   |
| 12       | 2   | 3                 | 5.1       | 2.8 | 488  | 4.8       | 2.0 | 476  |
| 12       | 2   | 4                 | 1.6       | 0.0 | 46   | 1.3       | 0.0 | 51   |
| 12       | 2   | 5                 | 4.4       | 2.2 | 402  | 4.8       | 2.0 | 393  |
| 12       | 3   | 1                 | 4.2       | 2.5 | 429  | 4.4       | 2.5 | 427  |
| 12       | 3   | 2                 | 1.1       | 0.3 | 82   | 1.0       | 0.4 | 78   |
| 12       | 3   | 3                 | 5.5       | 2.0 | 423  | 5.2       | 1.4 | 341  |
| 12       | 3   | 4                 | 1.6       | 0.0 | 85   | 2.1       | 0.0 | 85   |
| 12       | 3   | 5                 | 4.4       | 2.5 | 437  | 4.9       | 2.4 | 436  |
| 12       | 4   | 1                 | 4.3       | 2.1 | 395  | 4.7       | 2.0 | 389  |
| 12       | 4   | 2                 | 0.8       | 0.5 | 91   | 0.9       | 0.6 | 91   |
| 12       | 4   | 3                 | 5.9       | 2.8 | 522  | 5.9       | 2.7 | 511  |
| 12       | 4   | 4                 | 1.0       | 0.0 | 46   | 1.3       | 0.0 | 51   |
| 12       | 4   | 5                 | 4.8       | 2.6 | 455  | 5.3       | 2.4 | 454  |
| 12       | 5   | 1                 | 4.3       | 2.1 | 395  | 4.7       | 2.0 | 389  |
| 12       | 5   | 2                 | 1.1       | 0.3 | 82   | 1.0       | 0.4 | 78   |
| 13       | 1   | 3                 | 5.7       | 2.6 | 492  | 6.1       | 2.4 | 490  |
| 13       | 1   | 4                 | 1.0       | 0.0 | 46   | 1.3       | 0.0 | 51   |
| 13       | 1   | 5                 | 3.7       | 2.5 | 406  | 4.1       | 2.4 | 405  |
| 13       | 2   | 1                 | 3.4       | 2.2 | 368  | 3.8       | 2.1 | 367  |
| 13       | 2   | 3                 | 5.1       | 2.8 | 488  | 5.8       | 2.8 | 513  |
| 13       | 2   | 4                 | 1.0       | 0.0 | 46   | 1.3       | 0.0 | 51   |
| 13       | 2   | 5                 | 3.4       | 1.9 | 332  | 4.3       | 1.9 | 364  |
| 13       | 3   | 1                 | 3.2       | 2.2 | 351  | 3.4       | 2.1 | 344  |
| 13       | 3   | 2                 | 1.1       | 0.3 | 82   | 1.0       | 0.4 | 78   |
| 13       | 3   | 3                 | 5.3       | 1.9 | 412  | 5.0       | 1.3 | 330  |
| 13       | 3   | 4                 | 1.0       | 0.0 | 46   | 0.9       | 0.0 | 34   |
| 13       | 3   | 5                 | 3.3       | 2.2 | 359  | 3.8       | 2.1 | 358  |
| 13       | 4   | 1                 | 3.3       | 2.0 | 330  | 3.6       | 1.8 | 323  |
| 13       | 4   | 2                 | 0.8       | 0.5 | 91   | 0.9       | 0.6 | 91   |
| 13       | 4   | 3                 | 5.5       | 2.0 | 428  | 5.5       | 2.0 | 417  |
| 13       | 4   | 4                 | 1.0       | 0.0 | 46   | 1.3       | 0.0 | 51   |
| 13       | 4   | 5                 | 3.7       | 2.5 | 406  | 4.1       | 2.4 | 405  |
| 13       | 5   | 1                 | 3.2       | 1.9 | 326  | 3.5       | 1.8 | 319  |
| 14       | 1   | 3                 | 4.5       | 2.1 | 489  | 4.6       | 2.2 | 403  |
| 14       | 1   | 4                 | 1.0       | 0.0 | 46   | 1.3       | 0.0 | 51   |
| 14       | 1   | 5                 | 3.4       | 2.3 | 378  | 3.6       | 2.2 | 365  |
| 14       | 2   | 1                 | 3.3       | 1.9 | 326  | 3.5       | 1.8 | 319  |
| 14       | 2   | 2                 | 1.1       | 0.2 | 82   | 1.0       | 0.0 | 78   |
| 14       | 2   | 3                 | 5.4       | 2.6 | 484  | 3.8       | 2.3 | 383  |
| 14       | 2   | 4                 | 1.0       | 0.0 | 46   | 1.3       | 0.0 | 51   |
| 14       | 2   | 5                 | 3.3       | 2.2 | 360  | 3.8       | 2.1 | 358  |
| 14       | 3   | 1                 | 3.2       | 1.9 | 326  | 3.5       | 1.8 | 319  |
| 14       | 3   | 2                 | 0.8       | 0.5 | 91   | 0.8       | 0.6 | 92   |
| 14       | 3   | 3                 | 5.1       | 2.3 | 438  | 6.0       | 1.9 | 420  |
| 14       | 3   | 4                 | 1.0       | 0.0 | 46   | 1.3       | 0.0 | 51   |
| 14       | 3   | 5                 | 3.7       | 2.5 | 406  | 4.1       | 2.4 | 405  |
| 14       | 4   | 1                 | 3.5       | 2.3 | 380  | 3.8       | 2.1 | 358  |
| 14       | 4   | 2                 | 1.1       | 0.3 | 82   | 1.0       | 0.4 | 78   |
| 14       | 4   | 3                 | 4.9       | 1.8 | 388  | 4.8       | 1.2 | 317  |
| 14       | 4   | 4                 | 1.0       | 0.0 | 46   | 1.3       | 0.0 | 51   |
| 14       | 4   | 5                 | 3.2       | 2.2 | 351  | 3.4       | 2.1 | 344  |
| 15       | 1   | 3                 | 5.0       | 4.9 | 684  | 4.7       | 3.8 | 568  |
| 15       | 1   | 4                 | 1.0       | 0.0 | 46   | 1.3       | 0.0 | 51   |

| Pat. no. | Day | Meal <sup>1</sup> | Dietitian |     |      | VoiceDiab |     |      |
|----------|-----|-------------------|-----------|-----|------|-----------|-----|------|
|          |     |                   | CU        | PFU | kcal | CU        | PFU | kcal |
| 15       | 1   | 5                 | 4.6       | 3.1 | 500  | 5.0       | 3.0 | 497  |
| 15       | 2   | 1                 | 4.3       | 2.8 | 456  | 4.7       | 2.6 | 450  |
| 15       | 2   | 2                 | 1.2       | 0.4 | 98   | 1.3       | 0.5 | 99   |
| 15       | 2   | 3                 | 7.3       | 4.5 | 750  | 8.0       | 4.1 | 728  |
| 15       | 2   | 4                 | 1.0       | 0.0 | 46   | 1.3       | 0.0 | 51   |
| 15       | 2   | 5                 | 4.4       | 2.9 | 474  | 4.9       | 2.8 | 474  |
| 15       | 3   | 1                 | 4.3       | 2.5 | 432  | 4.6       | 3.4 | 523  |
| 15       | 3   | 2                 | 1.2       | 0.6 | 111  | 1.3       | 0.6 | 111  |
| 15       | 3   | 3                 | 6.1       | 3.7 | 621  | 7.2       | 3.2 | 599  |
| 15       | 3   | 4                 | 1.0       | 0.0 | 46   | 1.2       | 0.0 | 46   |
| 15       | 3   | 5                 | 4.8       | 2.9 | 492  | 5.3       | 2.8 | 492  |
| 15       | 4   | 1                 | 4.6       | 3.1 | 502  | 4.9       | 2.8 | 474  |
| 15       | 4   | 2                 | 1.2       | 0.5 | 98   | 1.3       | 0.5 | 99   |
| 15       | 4   | 3                 | 6.5       | 3.2 | 586  | 6.2       | 2.0 | 444  |
| 15       | 4   | 4                 | 1.0       | 0.0 | 46   | 1.3       | 0.0 | 51   |
| 15       | 4   | 5                 | 4.2       | 2.9 | 466  | 4.6       | 2.8 | 460  |
| 16       | 1   | 3                 | 4.7       | 3.3 | 521  | 4.8       | 2.7 | 463  |
| 16       | 1   | 4                 | 1.0       | 0.0 | 46   | 0.9       | 0.0 | 34   |
| 16       | 1   | 5                 | 3.7       | 2.5 | 406  | 4.1       | 2.4 | 405  |
| 16       | 2   | 1                 | 3.3       | 2.2 | 359  | 3.8       | 2.1 | 358  |
| 16       | 2   | 3                 | 5.0       | 1.9 | 397  | 5.5       | 1.4 | 355  |
| 16       | 2   | 4                 | 1.0       | 0.0 | 46   | 0.9       | 0.0 | 34   |
| 16       | 2   | 5                 | 3.5       | 2.2 | 371  | 3.8       | 2.2 | 368  |
| 16       | 3   | 1                 | 3.2       | 2.4 | 374  | 3.5       | 2.3 | 367  |
| 16       | 3   | 3                 | 5.4       | 2.3 | 460  | 4.2       | 2.3 | 402  |
| 16       | 3   | 4                 | 1.0       | 0.0 | 46   | 0.9       | 0.0 | 34   |
| 16       | 3   | 5                 | 3.7       | 2.5 | 406  | 4.1       | 2.4 | 405  |
| 16       | 4   | 1                 | 3.3       | 3.2 | 462  | 3.8       | 3.1 | 462  |
| 16       | 4   | 2                 | 0.9       | 0.4 | 77   | 1.0       | 0.4 | 78   |
| 16       | 4   | 3                 | 4.6       | 2.5 | 446  | 4.4       | 1.3 | 308  |
| 16       | 4   | 4                 | 1.0       | 0.0 | 55   | 1.2       | 0.0 | 48   |
| 16       | 4   | 5                 | 3.6       | 2.0 | 397  | 3.9       | 2.4 | 395  |
| 16       | 5   | 1                 | 3.7       | 2.5 | 406  | 4.1       | 2.4 | 405  |
| 16       | 5   | 3                 | 5.6       | 2.3 | 454  | 5.4       | 2.4 | 451  |
| 17       | 1   | 3                 | 4.7       | 3.3 | 521  | 4.8       | 2.7 | 463  |
| 17       | 1   | 4                 | 1.0       | 0.0 | 46   | 0.9       | 0.0 | 34   |
| 17       | 1   | 5                 | 3.7       | 2.5 | 406  | 4.1       | 2.4 | 405  |
| 17       | 2   | 1                 | 3.3       | 2.2 | 359  | 3.8       | 2.1 | 358  |
| 17       | 2   | 3                 | 5.0       | 1.9 | 397  | 5.5       | 1.4 | 355  |
| 17       | 2   | 4                 | 1.0       | 0.0 | 46   | 0.9       | 0.0 | 34   |
| 17       | 2   | 5                 | 3.3       | 2.4 | 379  | 3.6       | 2.5 | 396  |
| 17       | 3   | 1                 | 3.2       | 2.2 | 361  | 3.4       | 2.1 | 344  |
| 17       | 3   | 3                 | 5.4       | 2.3 | 460  | 5.5       | 2.4 | 461  |
| 17       | 3   | 4                 | 1.0       | 0.0 | 46   | 1.3       | 0.0 | 51   |
| 17       | 3   | 5                 | 3.7       | 2.5 | 460  | 4.1       | 2.4 | 405  |
| 17       | 4   | 1                 | 3.3       | 3.2 | 462  | 3.8       | 3.1 | 462  |
| 17       | 4   | 3                 | 4.6       | 2.5 | 446  | 4.4       | 1.3 | 308  |
| 17       | 4   | 5                 | 3.3       | 1.9 | 325  | 3.6       | 1.8 | 323  |
| 17       | 5   | 1                 | 3.7       | 2.5 | 406  | 4.1       | 2.4 | 405  |
| 17       | 5   | 3                 | 5.6       | 2.3 | 454  | 5.4       | 2.4 | 451  |
| 18       | 1   | 3                 | 4.5       | 3.5 | 538  | 4.4       | 3.0 | 480  |
| 18       | 1   | 4                 | 1.0       | 0.0 | 46   | 0.9       | 0.0 | 34   |
| 18       | 1   | 5                 | 3.3       | 2.3 | 356  | 3.6       | 2.2 | 365  |
| 18       | 2   | 1                 | 3.4       | 1.9 | 334  | 3.7       | 1.9 | 337  |

| Pat. no. | Day | Meal <sup>1</sup> | Dietitian |     |      | VoiceDiab |     |      |
|----------|-----|-------------------|-----------|-----|------|-----------|-----|------|
|          |     |                   | CU        | PFU | kcal | CU        | PFU | kcal |
| 18       | 2   | 3                 | 5.0       | 3.1 | 515  | 5.4       | 1.7 | 379  |
| 18       | 2   | 4                 | 1.0       | 0.0 | 46   | 1.3       | 0.0 | 51   |
| 18       | 2   | 5                 | 3.2       | 2.2 | 351  | 3.4       | 2.1 | 344  |
| 18       | 3   | 1                 | 3.2       | 2.6 | 396  | 3.5       | 2.5 | 389  |
| 18       | 3   | 2                 | 0.8       | 0.2 | 57   | 0.8       | 0.5 | 83   |
| 18       | 3   | 3                 | 5.3       | 2.7 | 486  | 6.5       | 2.4 | 501  |
| 18       | 3   | 4                 | 1.0       | 0.0 | 46   | 1.3       | 0.0 | 51   |
| 18       | 3   | 5                 | 3.4       | 1.9 | 334  | 3.9       | 1.8 | 333  |
| 18       | 4   | 1                 | 3.4       | 1.9 | 334  | 3.9       | 1.8 | 333  |
| 18       | 4   | 2                 | 0.9       | 0.4 | 77   | 1.0       | 0.4 | 78   |
| 18       | 4   | 3                 | 4.8       | 2.0 | 395  | 5.1       | 1.5 | 353  |
| 18       | 4   | 4                 | 1.0       | 0.0 | 46   | 1.3       | 0.0 | 51   |
| 18       | 4   | 5                 | 3.2       | 2.2 | 351  | 3.4       | 2.1 | 344  |
| 19       | 1   | 3                 | 6.0       | 2.9 | 529  | 6.3       | 2.8 | 529  |
| 19       | 1   | 4                 | 2.0       | 0.4 | 131  | 2.0       | 0.3 | 112  |
| 19       | 1   | 5                 | 5.3       | 3.3 | 534  | 5.5       | 3.2 | 534  |
| 19       | 2   | 1                 | 5.3       | 3.3 | 534  | 5.5       | 3.2 | 534  |
| 19       | 2   | 3                 | 5.0       | 3.3 | 534  | 5.3       | 2.3 | 447  |
| 19       | 2   | 4                 | 2.0       | 0.4 | 131  | 2.0       | 0.3 | 131  |
| 19       | 2   | 5                 | 5.5       | 3.1 | 539  | 5.9       | 3.1 | 545  |
| 19       | 3   | 1                 | 5.4       | 3.2 | 539  | 5.9       | 3.0 | 539  |
| 19       | 3   | 2                 | 1.0       | 0.7 | 114  | 1.2       | 0.7 | 114  |
| 19       | 3   | 3                 | 7.5       | 4.4 | 746  | 7.7       | 3.9 | 701  |
| 19       | 3   | 4                 | 2.0       | 0.4 | 131  | 2.0       | 0.3 | 112  |
| 19       | 3   | 5                 | 5.9       | 3.6 | 605  | 6.5       | 3.4 | 605  |
| 19       | 4   | 1                 | 5.4       | 3.2 | 539  | 5.9       | 3.0 | 533  |
| 19       | 4   | 2                 | 1.0       | 0.4 | 98   | 1.3       | 0.5 | 99   |
| 19       | 4   | 3                 | 5.8       | 5.1 | 750  | 5.3       | 4.0 | 603  |
| 19       | 4   | 4                 | 2.0       | 0.4 | 131  | 2.0       | 0.3 | 112  |
| 19       | 4   | 5                 | 5.4       | 4.4 | 661  | 6.1       | 4.2 | 661  |
| 19       | 5   | 1                 | 5.9       | 3.2 | 568  | 6.5       | 3.1 | 568  |
| 19       | 5   | 2                 | 1.0       | 0.2 | 69   | 1.1       | 0.3 | 78   |
| 19       | 5   | 3                 | 7.5       | 2.4 | 551  | 6.8       | 1.6 | 429  |
| 20       | 1   | 3                 | 5.8       | 3.2 | 563  | 6.0       | 3.2 | 556  |
| 20       | 1   | 4                 | 1.0       | 0.0 | 46   | 0.9       | 0.0 | 34   |
| 20       | 1   | 5                 | 3.2       | 1.9 | 326  | 3.4       | 1.9 | 323  |
| 20       | 2   | 1                 | 3.2       | 1.9 | 326  | 3.5       | 1.8 | 319  |
| 20       | 2   | 3                 | 5.2       | 3.1 | 524  | 5.2       | 3.1 | 522  |
| 20       | 2   | 4                 | 1.0       | 0.0 | 46   | 1.3       | 0.0 | 51   |
| 20       | 2   | 5                 | 3.3       | 2.2 | 359  | 3.8       | 2.1 | 358  |
| 20       | 3   | 1                 | 4.7       | 2.5 | 452  | 5.2       | 2.4 | 446  |
| 20       | 3   | 3                 | 7.6       | 2.3 | 540  | 7.3       | 2.2 | 536  |
| 20       | 3   | 4                 | 1.0       | 0.0 | 46   | 1.3       | 0.0 | 51   |
| 20       | 3   | 5                 | 4.0       | 3.2 | 486  | 4.4       | 3.2 | 493  |
| 20       | 4   | 1                 | 4.2       | 1.9 | 372  | 4.6       | 1.8 | 360  |
| 20       | 4   | 3                 | 6.5       | 2.4 | 510  | 5.9       | 2.7 | 506  |
| 20       | 4   | 4                 | 1.0       | 0.0 | 46   | 1.3       | 0.0 | 51   |
| 20       | 4   | 5                 | 4.2       | 3.3 | 503  | 4.7       | 3.2 | 510  |
| 20       | 5   | 1                 | 4.2       | 1.9 | 372  | 4.6       | 1.8 | 360  |
| 20       | 5   | 2                 | 3.1       | 1.9 | 324  | 3.2       | 1.1 | 238  |
| 21       | 1   | 3                 | 5.8       | 3.2 | 563  | 6.0       | 3.2 | 556  |
| 21       | 1   | 4                 | 1.0       | 0.0 | 46   | 0.9       | 0.0 | 34   |
| 21       | 1   | 5                 | 3.2       | 1.9 | 326  | 3.5       | 1.8 | 319  |
| 21       | 2   | 1                 | 3.2       | 1.9 | 326  | 3.5       | 1.8 | 319  |



| Pat. no. | Day | Meal <sup>1</sup> | Dietitian |     |      | VoiceDiab |     |      |
|----------|-----|-------------------|-----------|-----|------|-----------|-----|------|
|          |     |                   | CU        | PFU | kcal | CU        | PFU | kcal |
| 21       | 2   | 3                 | 5.2       | 3.1 | 524  | 5.2       | 3.1 | 522  |
| 21       | 2   | 4                 | 1.0       | 0.0 | 46   | 1.3       | 0.0 | 51   |
| 21       | 2   | 5                 | 3.3       | 2.2 | 359  | 3.8       | 2.1 | 358  |
| 21       | 3   | 1                 | 3.7       | 2.5 | 406  | 4.1       | 2.4 | 405  |
| 21       | 3   | 2                 | 0.8       | 0.2 | 57   | 0.9       | 0.3 | 66   |
| 21       | 3   | 3                 | 4.0       | 2.0 | 370  | 3.7       | 2.0 | 341  |
| 21       | 3   | 4                 | 1.0       | 0.0 | 46   | 1.3       | 0.0 | 51   |
| 21       | 3   | 5                 | 4.0       | 3.2 | 486  | 3.5       | 2.5 | 389  |
| 21       | 4   | 1                 | 3.2       | 1.9 | 326  | 3.5       | 1.8 | 319  |
| 21       | 4   | 3                 | 3.2       | 2.3 | 367  | 3.2       | 2.3 | 354  |
| 21       | 4   | 4                 | 1.0       | 0.0 | 46   | 1.3       | 0.0 | 51   |
| 21       | 4   | 5                 | 3.7       | 2.5 | 406  | 4.1       | 2.4 | 405  |
| 21       | 5   | 2                 | 0.8       | 0.2 | 57   | 0.9       | 0.2 | 57   |
| 22       | 1   | 3                 | 6.1       | 3.4 | 585  | 6.2       | 3.4 | 585  |
| 22       | 1   | 4                 | 1.0       | 0.0 | 46   | 1.3       | 0.0 | 51   |
| 22       | 1   | 5                 | 3.7       | 2.5 | 406  | 4.1       | 2.4 | 405  |
| 22       | 2   | 1                 | 3.4       | 1.9 | 334  | 3.7       | 1.9 | 337  |
| 22       | 2   | 2                 | 0.9       | 0.4 | 77   | 1.0       | 0.4 | 78   |
| 22       | 2   | 3                 | 5.4       | 2.0 | 421  | 5.3       | 1.4 | 351  |
| 22       | 2   | 5                 | 3.2       | 2.5 | 385  | 3.5       | 2.5 | 389  |
| 22       | 3   | 1                 | 3.7       | 2.1 | 404  | 4.0       | 2.4 | 400  |
| 22       | 3   | 2                 | 0.8       | 0.2 | 58   | 0.9       | 0.2 | 59   |
| 22       | 3   | 3                 | 5.6       | 2.5 | 488  | 6.1       | 1.8 | 428  |
| 22       | 3   | 4                 | 1.0       | 0.0 | 46   | 0.9       | 0.0 | 34   |
| 22       | 3   | 5                 | 3.4       | 1.9 | 332  | 3.6       | 1.8 | 323  |
| 22       | 4   | 1                 | 3.3       | 2.2 | 359  | 3.8       | 2.1 | 358  |
| 22       | 4   | 2                 | 0.8       | 0.2 | 52   | 0.9       | 0.2 | 57   |
| 22       | 4   | 3                 | 5.0       | 3.0 | 511  | 5.0       | 2.5 | 452  |
| 22       | 4   | 4                 | 1.0       | 0.0 | 46   | 1.3       | 0.0 | 51   |
| 22       | 4   | 5                 | 3.7       | 2.5 | 404  | 3.9       | 2.4 | 395  |
| 22       | 5   | 1                 | 3.3       | 2.9 | 431  | 3.8       | 2.8 | 430  |
| 22       | 5   | 2                 | 0.8       | 0.2 | 52   | 0.8       | 0.2 | 53   |
| 22       | 5   | 3                 | 5.4       | 2.4 | 472  | 5.8       | 2.3 | 459  |
| 23       | 1   | 3                 | 5.2       | 1.9 | 416  | 5.2       | 0.8 | 283  |
| 23       | 1   | 4                 | 1.0       | 0.0 | 46   | 0.9       | 0.0 | 34   |
| 23       | 1   | 5                 | 3.2       | 2.5 | 385  | 3.5       | 2.4 | 378  |
| 23       | 2   | 1                 | 3.5       | 2.5 | 398  | 3.8       | 2.4 | 391  |
| 23       | 2   | 2                 | 0.6       | 0.3 | 56   | 0.7       | 0.3 | 57   |
| 23       | 2   | 3                 | 5.0       | 5.0 | 463  | 4.9       | 2.5 | 449  |
| 23       | 2   | 4                 | 1.0       | 0.0 | 46   | 1.3       | 0.0 | 51   |
| 23       | 2   | 5                 | 3.4       | 1.9 | 334  | 3.8       | 1.8 | 332  |
| 23       | 3   | 1                 | 3.2       | 2.9 | 423  | 3.4       | 1.7 | 305  |
| 23       | 3   | 2                 | 0.5       | 0.0 | 23   | 0.5       | 0.0 | 25   |
| 23       | 3   | 3                 | 4.6       | 2.8 | 458  | 4.1       | 2.8 | 438  |
| 23       | 3   | 4                 | 1.0       | 0.0 | 46   | 1.3       | 0.0 | 51   |
| 23       | 3   | 5                 | 3.7       | 1.8 | 339  | 4.1       | 1.7 | 401  |
| 23       | 4   | 1                 | 3.3       | 2.2 | 362  | 3.6       | 2.1 | 358  |
| 23       | 4   | 3                 | 4.4       | 3.5 | 532  | 5.1       | 3.9 | 589  |
| 24       | 1   | 3                 | 7.7       | 4.7 | 787  | 8.0       | 4.2 | 742  |
| 24       | 1   | 4                 | 1.0       | 0.0 | 46   | 1.3       | 0.0 | 51   |
| 24       | 1   | 5                 | 5.6       | 2.8 | 509  | 6.2       | 2.6 | 510  |
| 24       | 2   | 1                 | 5.3       | 3.3 | 544  | 5.7       | 3.1 | 538  |
| 24       | 2   | 2                 | 1.0       | 0.6 | 109  | 1.2       | 0.6 | 109  |
| 24       | 2   | 3                 | 7.3       | 5.1 | 806  | 6.4       | 5.2 | 766  |

| Pat. no. | Day | Meal <sup>1</sup> | Dietitian |     |      | VoiceDiab |     |      |
|----------|-----|-------------------|-----------|-----|------|-----------|-----|------|
|          |     |                   | CU        | PFU | kcal | CU        | PFU | kcal |
| 24       | 2   | 5                 | 5.8       | 3.0 | 541  | 6.2       | 3.0 | 547  |
| 24       | 3   | 1                 | 5.4       | 2.8 | 502  | 5.6       | 2.8 | 502  |
| 24       | 3   | 2                 | 0.9       | 0.0 | 84   | 1.0       | 0.4 | 85   |
| 24       | 3   | 3                 | 6.3       | 4.1 | 669  | 5.9       | 2.9 | 525  |
| 24       | 3   | 5                 | 5.4       | 3.3 | 552  | 5.8       | 3.2 | 558  |
| 24       | 4   | 1                 | 5.8       | 3.0 | 541  | 6.4       | 2.8 | 541  |
| 24       | 4   | 2                 | 1.0       | 0.0 | 92   | 1.1       | 0.5 | 92   |
| 24       | 4   | 3                 | 5.9       | 3.3 | 573  | 6.1       | 3.3 | 574  |
| 25       | 1   | 3                 | 5.2       | 1.8 | 399  | 5.3       | 1.5 | 362  |
| 25       | 1   | 4                 | 1.0       | 0.0 | 46   | 1.3       | 0.0 | 51   |
| 25       | 1   | 5                 | 3.2       | 1.9 | 326  | 3.5       | 1.8 | 319  |
| 25       | 2   | 1                 | 3.3       | 2.3 | 373  | 3.5       | 2.3 | 366  |
| 25       | 2   | 3                 | 4.9       | 2.1 | 416  | 4.6       | 2.1 | 389  |
| 25       | 2   | 4                 | 1.0       | 0.0 | 46   | 1.3       | 0.0 | 51   |
| 25       | 2   | 5                 | 3.3       | 2.2 | 359  | 3.8       | 2.1 | 358  |
| 25       | 3   | 1                 | 3.2       | 1.9 | 326  | 3.9       | 1.8 | 333  |
| 25       | 3   | 2                 | 0.8       | 0.6 | 91   | 0.9       | 0.6 | 97   |
| 25       | 3   | 3                 | 5.9       | 3.0 | 540  | 4.3       | 2.4 | 412  |
| 25       | 3   | 5                 | 3.7       | 2.5 | 406  | 4.3       | 2.4 | 412  |
| 25       | 4   | 1                 | 3.4       | 1.9 | 334  | 3.9       | 1.8 | 333  |
| 25       | 4   | 2                 | 0.6       | 0.3 | 56   | 0.7       | 0.3 | 57   |
| 25       | 4   | 3                 | 5.0       | 2.6 | 463  | 4.8       | 2.0 | 391  |
| 26       | 1   | 2                 | 1.7       | 0.4 | 110  | 1.9       | 0.3 | 109  |
| 26       | 1   | 3                 | 5.0       | 2.3 | 438  | 5.1       | 2.7 | 471  |
| 26       | 1   | 4                 | 1.0       | 0.0 | 46   | 1.3       | 0.0 | 51   |
| 26       | 1   | 5                 | 3.5       | 1.9 | 341  | 4.0       | 1.8 | 340  |
| 26       | 2   | 1                 | 3.4       | 2.2 | 360  | 3.7       | 2.1 | 356  |
| 26       | 2   | 3                 | 4.7       | 2.3 | 448  | 4.8       | 1.5 | 347  |
| 26       | 2   | 4                 | 1.0       | 0.0 | 46   | 1.3       | 0.0 | 51   |
| 26       | 2   | 5                 | 3.5       | 2.2 | 367  | 3.9       | 2.1 | 365  |
| 26       | 3   | 1                 | 3.3       | 2.2 | 357  | 3.6       | 2.1 | 353  |
| 26       | 3   | 3                 | 6.0       | 2.8 | 531  | 5.9       | 2.1 | 443  |
| 26       | 3   | 4                 | 1.0       | 0.0 | 46   | 1.3       | 0.0 | 51   |
| 26       | 3   | 5                 | 3.7       | 2.5 | 404  | 4.0       | 2.4 | 400  |
| 26       | 4   | 1                 | 3.4       | 1.9 | 334  | 3.9       | 1.8 | 333  |
| 26       | 4   | 2                 | 0.9       | 0.0 | 77   | 1.0       | 0.4 | 78   |
| 26       | 4   | 3                 | 5.4       | 1.9 | 512  | 5.4       | 2.4 | 452  |
| 26       | 4   | 4                 | 1.0       | 0.0 | 46   | 1.3       | 0.0 | 51   |
| 26       | 4   | 5                 | 3.4       | 1.9 | 332  | 3.7       | 1.8 | 328  |
| 27       | 1   | 3                 | 4.5       | 2.5 | 435  | 5.4       | 1.5 | 354  |
| 27       | 2   | 4                 | 1.0       | 0.0 | 46   | 1.3       | 0.0 | 51   |
| 27       | 2   | 5                 | 3.5       | 2.3 | 380  | 3.9       | 2.2 | 379  |
| 27       | 3   | 1                 | 2.2       | 0.7 | 166  | 2.5       | 0.7 | 166  |
| 27       | 3   | 2                 | 0.9       | 0.4 | 77   | 0.9       | 0.4 | 77   |
| 27       | 3   | 3                 | 3.2       | 2.4 | 382  | 2.9       | 1.8 | 293  |
| 27       | 3   | 4                 | 1.0       | 0.0 | 46   | 1.3       | 0.0 | 51   |
| 27       | 3   | 5                 | 2.3       | 1.5 | 247  | 2.7       | 1.4 | 246  |
| 27       | 4   | 1                 | 2.2       | 0.7 | 166  | 2.4       | 0.6 | 159  |
| 27       | 4   | 3                 | 4.7       | 2.8 | 477  | 4.7       | 2.9 | 475  |
| 27       | 4   | 4                 | 1.0       | 0.0 | 46   | 1.3       | 0.0 | 51   |
| 27       | 4   | 5                 | 2.6       | 1.8 | 293  | 2.9       | 1.8 | 292  |
| 27       | 5   | 1                 | 2.4       | 0.7 | 174  | 2.5       | 0.6 | 172  |
| 28       | 1   | 3                 | 5.2       | 1.9 | 408  | 5.3       | 1.9 | 408  |
| 28       | 1   | 4                 | 1.0       | 0.0 | 46   | 1.3       | 0.0 | 51   |

| Pat. no. | Day | Meal <sup>1</sup> | Dietitian |     |      | VoiceDiab |     |      |
|----------|-----|-------------------|-----------|-----|------|-----------|-----|------|
|          |     |                   | CU        | PFU | kcal | CU        | PFU | kcal |
| 28       | 1   | 5                 | 3.3       | 1.9 | 330  | 3.6       | 1.9 | 330  |
| 28       | 2   | 1                 | 3.2       | 1.9 | 326  | 3.5       | 1.8 | 319  |
| 28       | 2   | 2                 | 0.9       | 0.4 | 77   | 0.9       | 0.4 | 77   |
| 28       | 2   | 3                 | 4.7       | 2.5 | 442  | 4.8       | 1.9 | 384  |
| 28       | 2   | 4                 | 1.0       | 0.0 | 46   | 1.3       | 0.0 | 51   |
| 28       | 2   | 5                 | 3.4       | 2.7 | 413  | 3.8       | 2.6 | 412  |
| 28       | 3   | 1                 | 3.2       | 2.2 | 351  | 3.4       | 2.1 | 344  |
| 28       | 3   | 2                 | 0.5       | 0.6 | 85   | 0.6       | 0.6 | 84   |
| 28       | 3   | 3                 | 4.3       | 3.0 | 478  | 5.4       | 1.7 | 385  |
| 28       | 3   | 4                 | 1.0       | 0.0 | 46   | 1.3       | 0.0 | 51   |
| 28       | 3   | 5                 | 3.6       | 2.5 | 398  | 4.0       | 2.4 | 398  |
| 28       | 4   | 1                 | 3.3       | 1.9 | 326  | 3.6       | 1.9 | 330  |
| 28       | 4   | 2                 | 0.6       | 0.2 | 62   | 0.6       | 0.4 | 62   |
| 28       | 4   | 3                 | 5.0       | 2.1 | 433  | 5.2       | 1.5 | 346  |
| 28       | 4   | 4                 | 1.0       | 0.0 | 46   | 1.3       | 0.0 | 51   |
| 28       | 4   | 5                 | 3.2       | 1.9 | 326  | 3.5       | 1.8 | 319  |
| 29       | 1   | 3                 | 4.0       | 2.1 | 393  | 4.7       | 2.1 | 393  |
| 29       | 1   | 4                 | 1.0       | 0.0 | 46   | 1.3       | 0.0 | 51   |
| 29       | 1   | 5                 | 3.3       | 1.9 | 330  | 3.6       | 1.9 | 330  |
| 29       | 2   | 1                 | 4.1       | 2.5 | 425  | 4.4       | 2.4 | 412  |
| 29       | 2   | 2                 | 0.8       | 0.6 | 96   | 0.9       | 0.6 | 97   |
| 29       | 2   | 3                 | 5.9       | 2.1 | 451  | 5.2       | 1.4 | 341  |
| 29       | 2   | 4                 | 1.0       | 0.0 | 46   | 1.3       | 0.0 | 51   |
| 29       | 2   | 5                 | 4.5       | 2.0 | 392  | 4.4       | 1.9 | 386  |
| 29       | 3   | 1                 | 3.7       | 1.5 | 311  | 3.8       | 1.2 | 314  |
| 29       | 3   | 2                 | 1.6       | 0.2 | 108  | 1.5       | 0.3 | 106  |
| 29       | 3   | 3                 | 5.9       | 2.3 | 472  | 5.9       | 2.1 | 447  |
| 29       | 3   | 4                 | 1.0       | 0.0 | 46   | 0.9       | 0.0 | 34   |
| 29       | 3   | 5                 | 4.5       | 2.0 | 392  | 4.7       | 2.1 | 390  |
| 29       | 4   | 1                 | 3.6       | 2.5 | 408  | 3.7       | 2.4 | 388  |
| 29       | 4   | 2                 | 0.8       | 0.3 | 67   | 0.9       | 0.3 | 68   |
| 29       | 4   | 3                 | 5.3       | 2.2 | 437  | 5.9       | 2.1 | 447  |
| 30       | 1   | 1                 | 4.2       | 1.9 | 365  | 4.7       | 1.8 | 363  |
| 30       | 1   | 2                 | 0.9       | 0.4 | 77   | 1.0       | 0.4 | 82   |
| 30       | 1   | 3                 | 5.2       | 3.2 | 528  | 5.3       | 3.2 | 529  |
| 30       | 1   | 4                 | 1.0       | 0.0 | 46   | 1.3       | 0.0 | 51   |
| 30       | 1   | 5                 | 3.2       | 1.9 | 326  | 3.5       | 1.8 | 319  |
| 30       | 2   | 1                 | 4.9       | 2.6 | 465  | 5.5       | 2.4 | 461  |
| 30       | 2   | 2                 | 0.8       | 0.3 | 67   | 0.9       | 0.3 | 68   |
| 30       | 2   | 3                 | 5.9       | 2.8 | 520  | 6.6       | 1.8 | 435  |
| 30       | 2   | 4                 | 1.0       | 0.0 | 46   | 1.1       | 0.0 | 44   |
| 30       | 2   | 5                 | 3.6       | 2.5 | 400  | 4.0       | 2.5 | 416  |
| 30       | 3   | 1                 | 4.4       | 1.9 | 378  | 4.9       | 1.8 | 374  |
| 30       | 3   | 2                 | 0.9       | 0.4 | 77   | 1.0       | 0.4 | 78   |
| 30       | 3   | 3                 | 5.2       | 2.9 | 510  | 5.5       | 1.6 | 381  |
| 30       | 3   | 4                 | 1.0       | 0.0 | 46   | 1.3       | 0.0 | 51   |
| 30       | 3   | 5                 | 3.4       | 2.4 | 387  | 3.8       | 2.4 | 406  |
| 30       | 4   | 1                 | 4.3       | 2.9 | 477  | 5.0       | 2.8 | 476  |
| 30       | 4   | 2                 | 0.8       | 0.4 | 80   | 0.9       | 0.5 | 80   |
| 30       | 4   | 3                 | 5.6       | 2.4 | 400  | 5.7       | 1.7 | 393  |
| 30       | 4   | 4                 | 1.0       | 0.0 | 46   | 1.3       | 0.0 | 51   |
| 30       | 4   | 5                 | 3.2       | 1.9 | 326  | 3.5       | 1.8 | 319  |

<sup>1</sup> Meal codes: 1 – breakfast, 2 – morning snack, 3 – lunch, 4 – afternoon snack, 5 – dinner.
